# Supplementary material for: The Biochemical Activities of the Saccharomyces cerevisiae Pif1 Helicase Are Regulated by Its N-Terminal Domain
Source: PubMed Central journal article supplement (PMC6628001; doi:10.3390/genes10060411), 2019-05-28
Supplement: genes-10-00411-s001.pdf [file genes-10-00411-s001.pdf]

## Supplementary Materials

### The N-terminal domain of *Saccharomyces cerevisiae* Pif1 is necessary to regulate telomerase activity

David G. Nickens<sup>†</sup>, Christopher W. Sausen<sup>†</sup>, and Matthew L. Bochman\*

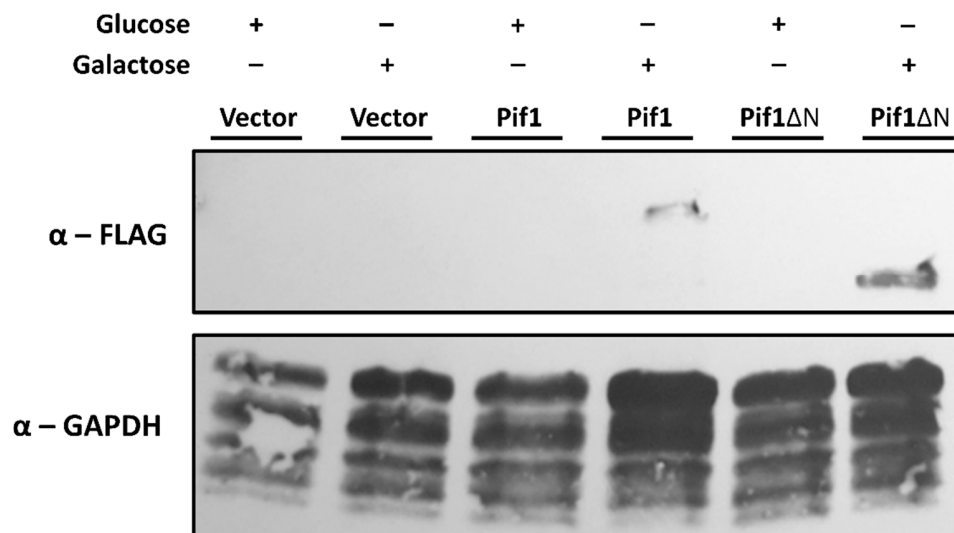

**Supplemental Figure S1.** Pif1 and Pif1ΔN are overexpressed to similar levels in vivo. Wild-type cells were transformed with empty pESC-URA vector (vector) or the same plasmid encoding FLAG-tagged Pif1 or Pif1ΔN under the control of the galactose-inducible *GAL1/10* promoter. Cells were then either grown in media containing glucose (repressive) or galactose (induction), lysed, and blotted with an anti-FLAG antibody. The levels of GAPDH were used as a loading control.

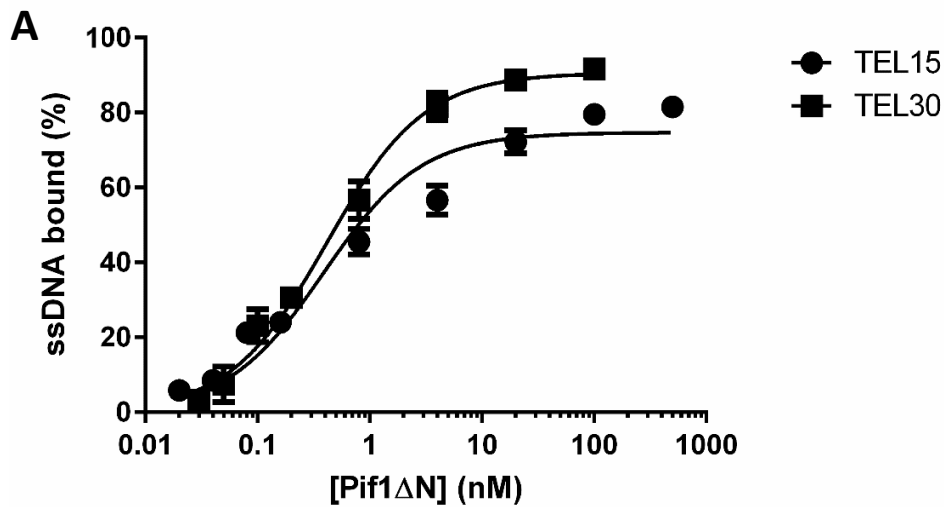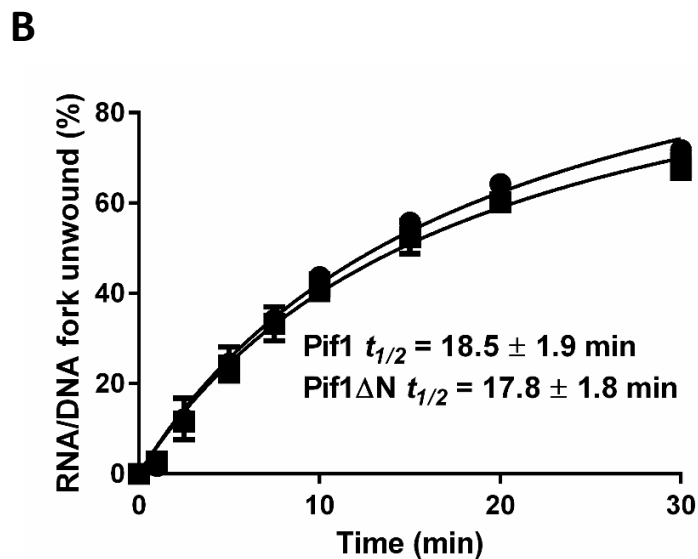

**Supplemental Figure S2.** Pif1 $\Delta$ N binds ssDNA tightly and unwinds DNA with similar kinetics to full-length Pif1. **(A)** Pif1 $\Delta$ N binds the Tel15 and Tel30 ssDNA substrates with similar affinity. The plotted values represent the results of EMSAs using radiolabeled substrates and the indicated concentrations of recombinant Pif1 $\Delta$ N protein. **(B)** Pif1 and Pif1 $\Delta$ N unwind forked DNA with similar kinetics. The plotted values represent DNA unwinding time course assays performed with 0.4 nM of a radiolabeled DNA-DNA fork substrate and 2 nM Pif1 or Pif1 $\Delta$ N. In all cases, the data represent the averages of  $\geq 3$  independent experiments, and the error bars are the standard deviation.
